# Supplementary material for: Synthesis and reversible thermo-induced conformational transitions of a stable nitroxide biradical based on calix[4]areneElectronic supplementary information (ESI) available: selected experimental details. See http://www.rsc.org/suppdata/cc/b2/b201010k/
Source: Royal Society of Chemistry journal article supplement (doi:10.1039/b201010k), 2002-05-14
Supplement: b201010k.doc [file b201010k.doc]

# Supplementary data

# **1. Spectroscopic measurements**

The ESR spectra were recorded on a Bruker ER200D-SRC X-band spectrometer equipped with a 100kHz field modulation. The magnetic fields were calibrated by using a Bruker ER 035M NMR gaussmeter. The microwave frequencies were measured with a Nanjing Sample Instrument SP 3382A frequency counter. The temperature was controlled using a Bruker ER 4111VT variable temperature unit. The IR, NMR, and mass spectra were measured with a Perkin-Elmer System 2000 FTIR, a Bruker AC200P NMR and a PE API 3000 HPLC-MS spectrometer, respectively. X-ray analysis data were obtained on a Bruker P4 four-circle diffractometer.

2. Programs

Simulation of the ESR spectra (Figure 1) were carried out using the WINEPR Simfonia program (Bruker Analytische Messtechnik Gmbh©, 1994-1996, Version 1.25) using the following parameters:

| Fig. 1 |  | nuclei | AN and linewidth (G) | AH and linewidth (G) | Ratio  (tri/quin) |
| --- | --- | --- | --- | --- | --- |
| a | triplet | 1 N | 13.60; 4.00 |  | 0.65/1 |
| quintet | 2 N | 6.40; 5.20 |  |
| b | triplet | 1 N, 2 H | 13.20, 1.94 | 1.85, 1.94 | 0.28/1 |
| quintet | 2 N | 6.40, 4.50 |  |
| c | triplet | 1 N, 2 H | 13.20, 1.60 | 1.85, 1.60 | 1:1 |
| quintet | 2 N | 6.60, 3.00 |  |

3. The 1H NMR study of Compounds II and III

In order to confirm the conformational transitions of the paramagnetic calixarene, 1H NMR studies have been done. The 1H NMR spectrum of III has been found to be useless because of the broadened lines. The most suitable analogue seems to be the synthesized precursor (compound II) of the III. The 1H NMR study of compound II in toluene-d5 showed that most of the molecules existed in partial cone conformation at room temperature and no significant conformation transition was found when the solvent was heated till boiling at nearly 110ºC. This can be explained well by the two intramolecular hydrogen bonds O―H∙∙∙∙∙∙N in II (just as shown in X-ray crystal structure analysis), which makes partial cone conformation very stable. But when II is oxidated to III, the abstraction of two hydrogens breaks the strong hydrogen bonds and the calixarene becomes more flexible. Because of this key difference between II and III, it is unavailable to compare their activities such as conformational transformations at high temperature.
